# Supplementary material for: Quantification of intractable membrane proteins in genetically engineered crops by liquid chromatography coupled with tandem mass spectrometry
Source: Royal Society of Chemistry journal article supplement (doi:10.1039/c7ay00161d), 2017-01-01
Supplement: c7ay00161d1.pdf [file c7ay00161d1.pdf]

## Figure ESI1

### Entire amino acid sequence of zmARGOS8

MMLHCTFAISEAPARALALGQVSMRAMPQEEEEAAVATTTMAGGKVAALLATAAALLLPLALPPLPPPPTQLLFVPVLLLLVASLAFCP  
AATSSPSMHAADHGSFGTTGSPHLC

## Figure ESI2

### Sequence alignment of endogenous and transgenic gmDGAT1

|            |                                                         |     |
|------------|---------------------------------------------------------|-----|
|            | 1                                                       | 50  |
| Endogenous | MAISDEPESVATALNHSSLRRRPSATSTAGLFNSPETTTDSSGDDLAKDS      |     |
| Transgenic | MAISDEPESVATALNHSSLRRRPSATSTAGLFNSPETTTDSSGDDLAKDS      |     |
|            | 51                                                      | 100 |
| Endogenous | GSDDSINSDDAAVNSQQQNEKQDTDFSVLKFAIRPSVPAHRKVKESPLSS      |     |
| Transgenic | GSDDSINNDDAAVNSQQQNEKQDTDFSVLKFAIRPSVPAHRKVKESPLSS      |     |
|            | 101                                                     | 150 |
| Endogenous | DTIFRQSHAGLFNLCIVVLVAVNSRLIIENLMKYGWLIKSGFWFSKSLR       |     |
| Transgenic | DTIFRQSHAGLFNLCIVVLVAVNSRLIIENLMKYGWLIKSGFWFSAKSLR      |     |
|            | 151                                                     | 200 |
| Endogenous | DWPLFMCCSLVVFPPFAAFIVEKLAQRKCIPEPVVVVLIHIIITSTSLFYP     |     |
| Transgenic | DWPLFMCCSLVVFPPFAAFMVEKLAQRKCIPEPVVVVLIHIIITSTSLFYP     |     |
|            | 201                                                     | 250 |
| Endogenous | VLVILRCDSAFVSGVTLMLFSCVVWLKLVSYAHTNYDMRALTKLVEKGEA      |     |
| Transgenic | VLVILKCDLAFVSGVTLMLFSCVVWLKLVFAHTNYDMRALTKLVEKGEA       |     |
|            | 251                                                     | 300 |
| Endogenous | LLDTLNMYPYVNSFKSLAYFLVAPTLCYQPSYPRTPYIRKGWLFRLVK        |     |
| Transgenic | LLDTLNMVYPYVNTFKSLAYFLVAPTLCYQPSYPRTPYIRKGWLFRLVK       |     |
|            | 301                                                     | 350 |
| Endogenous | LIIFTGVMGFIIIEQYINPIVQNSQHPLKGNLLYATERVLKLSVPNLYVWL     |     |
| Transgenic | LIVFTGVMGFIIIEQYINPIVQNSQHPLKGNLLYATERVLKLSVPNLYVWL     |     |
|            | 351                                                     | 400 |
| Endogenous | CMFYCFFHLWLNILAELLRFGDREFYKDWWNAKTVEDYWRMWNMPVHKWM      |     |
| Transgenic | CMFYCFFHLWLNIVAELLRFGDREFYKDWWNAKTVEDYWRMWNMPVHKWM      |     |
|            | 401                                                     | 450 |
| Endogenous | IRHLYFPCLRHGLPKAAALLIAFLVSALFHEL CIAVPCHI FKLWAFGGIM    |     |
| Transgenic | IRHLYFPCLRHGLPKAAALLISFLVSALFHEL CIAVPCHMFKLWAFGGIM     |     |
|            | 451                                                     | 500 |
| Endogenous | FQVPLVLIITNYLQNKFRNSMVGNMIFWFI FSI LGQPMCVLLYYHDL MNRK  |     |
| Transgenic | FQVPLVLIITNYLQNKFKNSMVGNMIFWFI FSI VLGQPMCVLLYYHDL MNRK |     |
|            | 501                                                     |     |
| Endogenous | GKLD                                                    |     |
| Transgenic | GKLD                                                    |     |
